# Supplementary material for: Suppression of Hepatic Epithelial-to-Mesenchymal Transition by Melittin via Blocking of TGFβ/Smad and MAPK-JNK Signaling Pathways
Source: PubMed Central journal article supplement (PMC5408212; doi:10.3390/toxins9040138), 2017-04-13
Supplement: toxins-09-00138-s001.pdf [file toxins-09-00138-s001.pdf]

# Supplementary Materials: Suppression of hepatic epithelial-to-mesenchymal transition by melittin via blocking of TGFβ/Smad and MAPK-JNK signaling pathways

Ji-Hyun Park, Byoungduck Park and Kwan-Kyu Park

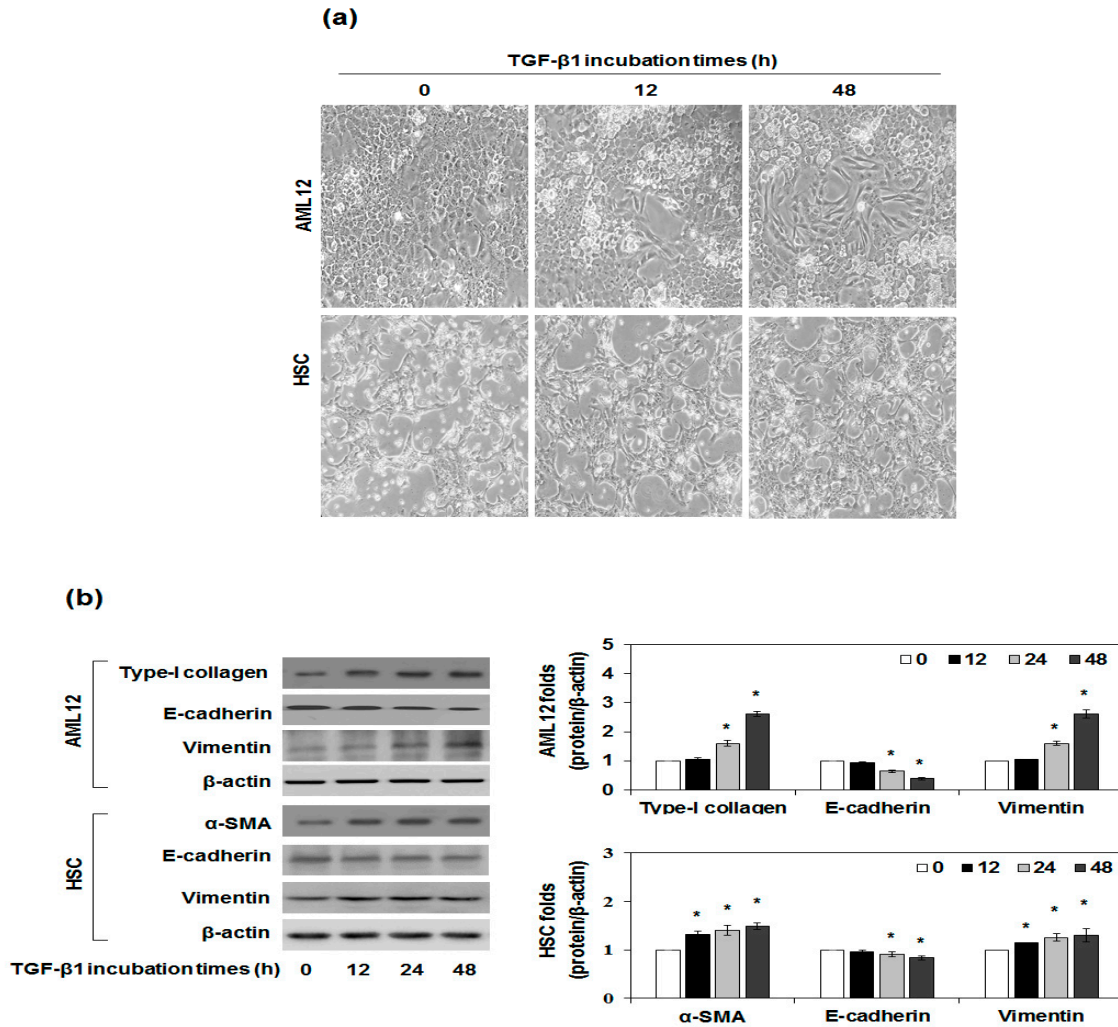

**Figure S1.** TGF-β1-stimulated EMT in AML12 and HSC. (a) Time effect of TGF-β1 on fibrosis and EMT were examined by morphologic changes in AML12 and HSC, 200× magnification. (b) Expression of fibrosis and EMT markers in TGF-β1-stimulated AML12 and HSC. The quantitative ratios are shown as relative optical densities of bands that are normalized to the expression of β-actin. The data are representative of three similar experiment and quantified as mean values ± S.E. \**p* < 0.05 versus normal control.

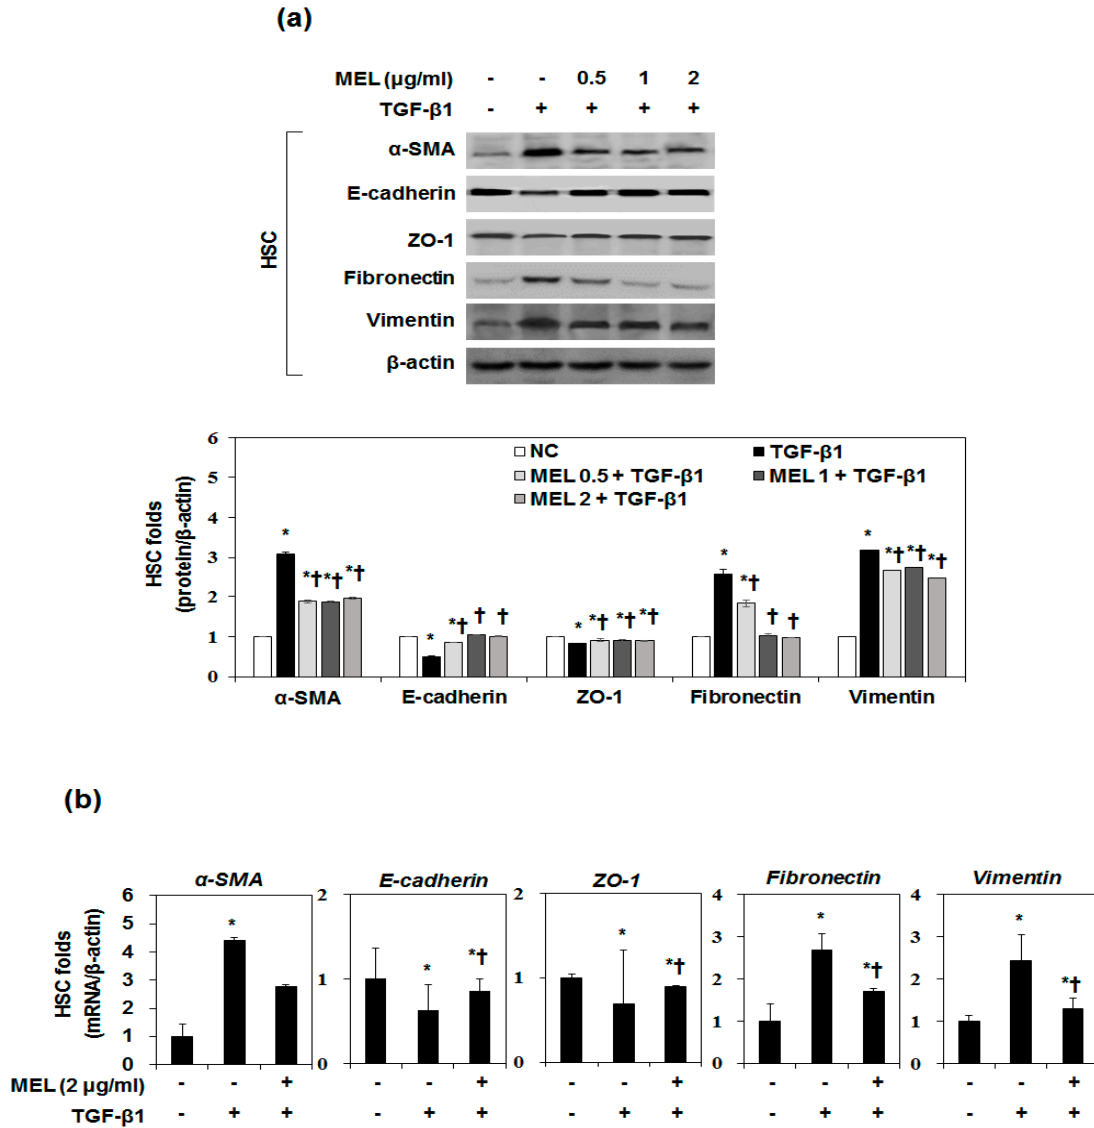

**Figure S2.** TGF-β1-stimulated EMT in HSC. MEL inhibited the TGF-β1-stimulated α-SMA and EMT marker in HSC protein expression (a) and RNA expression (b). The quantitative ratios are shown as relative optical densities of bands that are normalized to the expression of β-actin. The data are representative of three similar experiment and quantified as mean values ± S.E. \**p* < 0.05 versus normal control, † *p* < 0.05 versus TGF-β1 treatment.

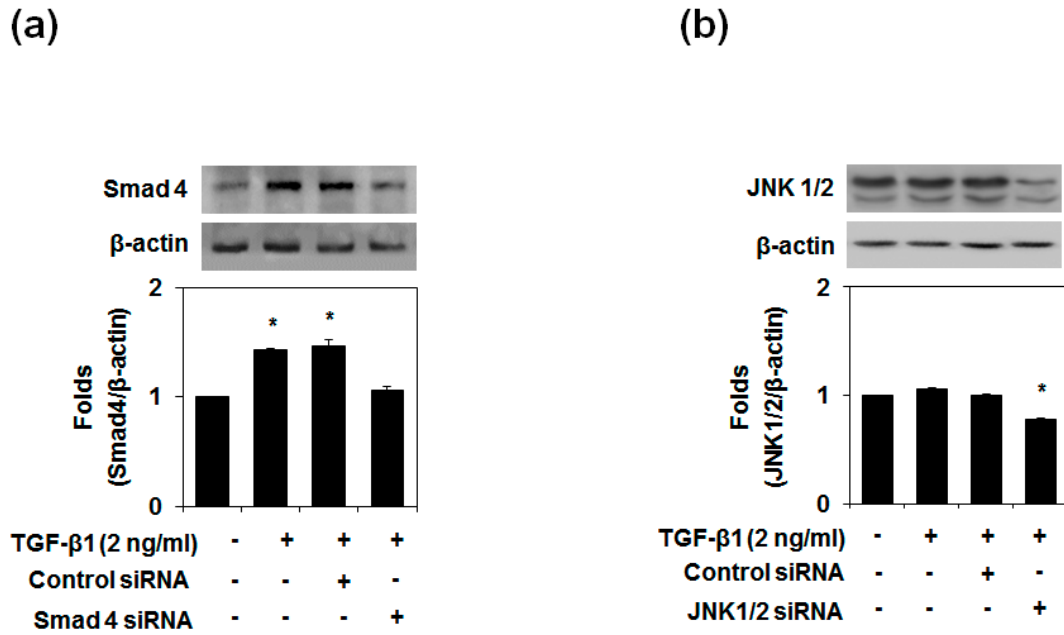

**Figure S3.** AML12 was transfected with control or specific Smad4 and JNK1/2 siRNA for 24 h. The expression of Smad4 and JNK1/2 were suppressed by Smad4 (a) and JNK1/2 (b) siRNA transfection. The quantitative ratios are shown as relative optical densities of bands that are normalized to the expression of β-actin. The data are representative of three similar experiment and quantified as mean values ± S.E. \**p* < 0.05 versus TGF-β1 treatment.

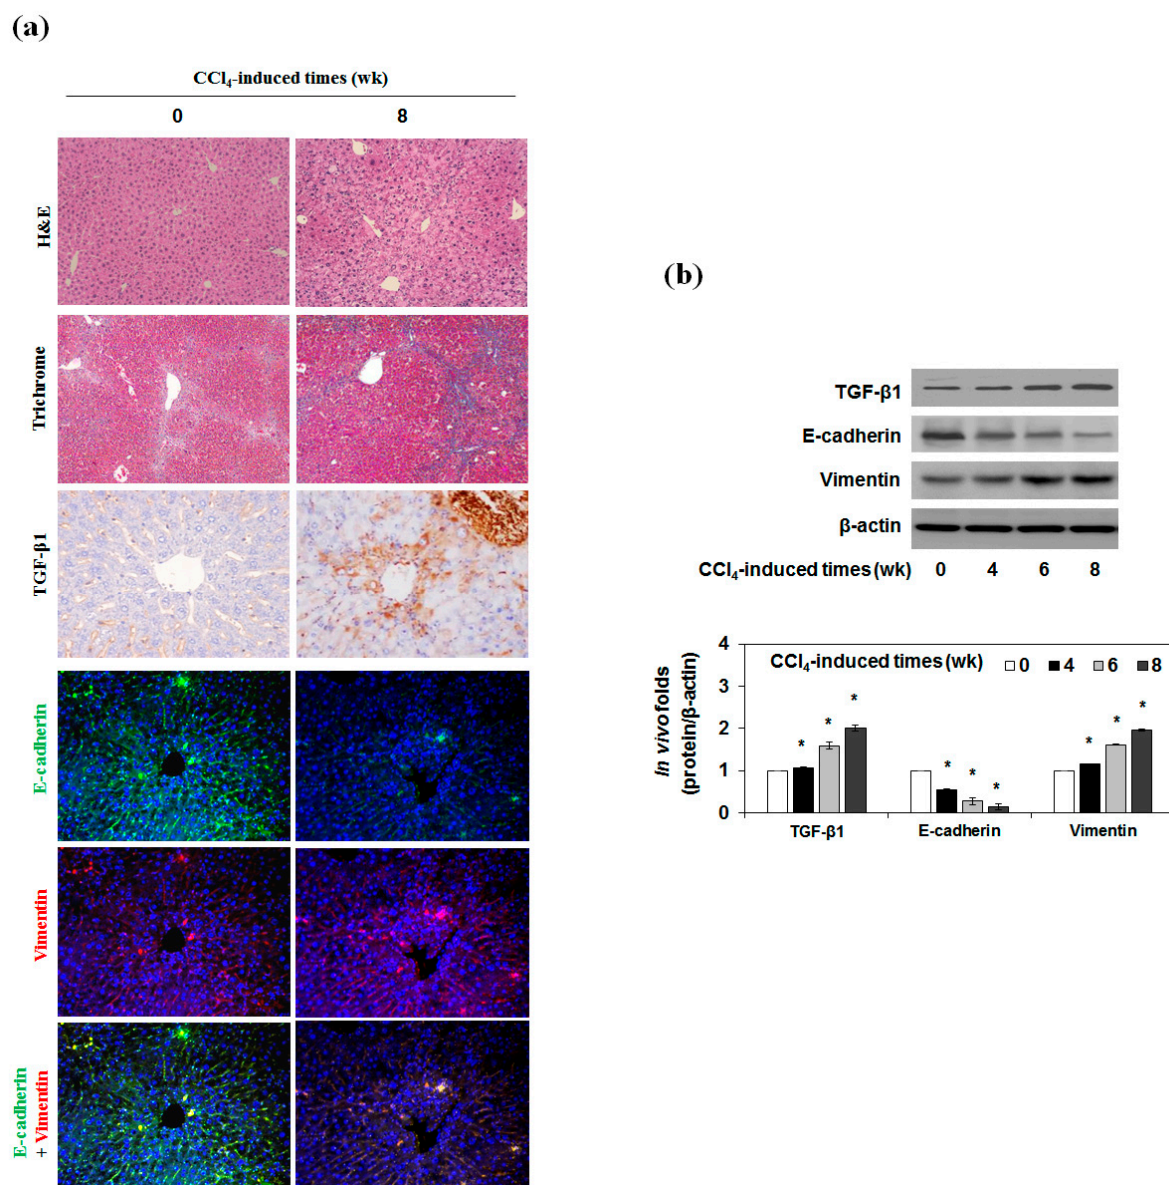

**Figure S4.** The histological changes in liver fibrosis and EMT induced by CCl<sub>4</sub>. (a) H&E staining (200×), Masson's trichrome staining (200×), immunohistochemistry for TGF-β1 (400×) and immunofluorescence double staining (400×) for E-cadherin (green) and vimentin (red), × magnification. (b) Expression of fibrosis and EMT markers in CCl<sub>4</sub> induction for 8 weeks *in vivo*. The quantitative ratios are shown as relative optical densities of bands that are normalized to the expression of β-actin. The data are representative of three similar experiment and quantified as mean values ± S.E. \**p* < 0.05 versus NC.

**Table S1.** Primers used for real-time qPCR.

| Gene Description   | Primer Sequences (F, forward; R, reverse)                              | References |
|--------------------|------------------------------------------------------------------------|------------|
| <i>α-SMA</i>       | F: 5'-GACAGAAACGAGACTGGGTCA-3'<br>R: 5'-CCGGTGATGCTGTAGAAAACC-3'       | [1]        |
| <i>E-cadherin</i>  | F: 5'-GACAGAAACGAGACTGGGTCA-3'<br>R: 5'-CCGGTGATGCTGTAGAAAACC-3'       | [2]        |
| <i>ZO-1</i>        | F: 5'-ACT CCCACT TCC CCAAAAAC-3'<br>R: 5'-CCACAG CTG AAGGAC TCA CA-3'  | [3]        |
| <i>Fibronectin</i> | F: 5'-TCTGGAAATGGAAAAGGGGAATGG-3'<br>R: 5'-CACTGAAGCAGGTTTCTCGGTTGT-3' | [1]        |

|                 |                                                                                   |     |
|-----------------|-----------------------------------------------------------------------------------|-----|
| <i>Vimentin</i> | F: 5'-GATCGATGTGGACGTTTCCAA-3'<br>R: 5'-GTTGGCAGCCTCAGAGAGGT-3'                   | [2] |
| <i>Zeb1</i>     | F: 5'-TGG CAA GAC AAC GTG AAA GA-3'<br>R: 5'-AAC TGG GAA AAT GCT TCT CTG G-3'     | [4] |
| <i>Zeb2</i>     | F: 5'-TGA CCG GTC CAG AAG AAA TG-3'<br>R: 5'-GGC CAT CTC TTT CCT CCA GT-3'        | [4] |
| <i>Twist</i>    | F: 5'-CCC CAC TTT TTG ACG AAG AAT G-3'<br>R: 5'-AAA ATG GAG CCA GTC ACA TGT GG-3' | [5] |
| <i>Snail1</i>   | F: 5'-CTT GTG TCT CGA CCT GT-3'<br>R: 5'-CTT CAC ATC CGA GTG GGT TT-3'            | [6] |
| <i>Snail2</i>   | F: 5'-GCA CTG TGA TGC CCA GTC TA-3'<br>R: 5'-CAG TGA GGG CAA GAG AAA GG-3'        | [6] |
| <i>β-actin</i>  | F: 5'-GACCTCTATGCCAACACAGTGC-3'<br>R: 5'-GTACTCCTGCTTGCTGATCCAC-3'                | [2] |

---

## References

1. Liu, G.; Friggeri, A.; Yang, Y.; Milosevic, J.; Ding, Q.; Thannickal, V.J.; Kaminski, N.; Abraham, E. Mir-21 mediates fibrogenic activation of pulmonary fibroblasts and lung fibrosis. *J. Exp. Med.* **2010**, *207*, 1589–1597.
2. Liu, J.; Zhang, Z.; Tu, X.; Liu, J.; Zhang, H.; Zhang, J.; Zang, Y.; Zhu, J.; Chen, J.; Dong, L., et al. Knockdown of n-acetylglucosaminyl transferase v ameliorates hepatotoxin-induced liver fibrosis in mice. *Toxicol. Sci.: An official journal of the Society of Toxicology* **2013**, *135*, 144–155.
3. Hwang, I.; An, B.S.; Yang, H.; Kang, H.S.; Jung, E.M.; Jeung, E.B. Tissue-specific expression of occludin, zona occludens-1, and junction adhesion molecule a in the duodenum, ileum, colon, kidney, liver, lung, brain, and skeletal muscle of c57bl mice. *J. physiol. and pharmacol.: an official journal of the Polish Physiological Society* **2013**, *64*, 11–18.
4. Oba, S.; Kumano, S.; Suzuki, E.; Nishimatsu, H.; Takahashi, M.; Takamori, H.; Kasuya, M.; Ogawa, Y.; Sato, K.; Kimura, K., et al. Mir-200b precursor can ameliorate renal tubulointerstitial fibrosis. *PLoS one* **2010**, *5*, e13614.
5. Copple, B.L. Hypoxia stimulates hepatocyte epithelial to mesenchymal transition by hypoxia-inducible factor and transforming growth factor-beta-dependent mechanisms. *Liver Int.: Official journal of the International Association for the Study of the Liver* **2010**, *30*, 669–682.
6. Chen, Y.L.; Lv, J.; Ye, X.L.; Sun, M.Y.; Xu, Q.; Liu, C.H.; Min, L.H.; Li, H.P.; Liu, P.; Ding, X. Sorafenib inhibits transforming growth factor beta1-mediated epithelial-mesenchymal transition and apoptosis in mouse hepatocytes. *Hepatology* **2011**, *53*, 1708–1718.
